# Supplementary material for: A Morphological and Morphometric Dental Analysis as a Forensic Tool to Identify the Iberian Wolf (Canis Lupus Signatus)
Source: MDPI journal article supplement (doi:10.3390/ani10060975), 2020-06-03
Supplement: s1 [file s1]

# Supplementary Materials: A Morphological and Morphometric Dental Analysis as a Forensic Tool to Identify the Iberian Wolf (*Canis Lupus Signatus*)

Víctor Toledo González, Fernando Ortega Ojeda, Gabriel M. Fonseca, Carmen García-Ruiz, Pablo Navarro Cáceres, Pilar Pérez-Lloret and María del Pilar Marín García

**Table S1.** Comparison of the mean values for the wolf sex differentiation (95% confidence) of 26 female and 19 male skulls. The comparison considered the existence or exclusion of the outlier values present only in seven specific variables. Va, variable; F, females; M, males; mm, millimetres.

| Va       |   | Mean with the outlier values<br>(mm) | Mean without the outlier values<br>(mm) |
|----------|---|--------------------------------------|-----------------------------------------|
| UiW      | F | 32.04                                | 32.04                                   |
|          | M | 34.35                                | 34.18                                   |
| L1Mc     | F | 48.42                                | 50.54                                   |
|          | M | 52.52                                | 54.28                                   |
| UrCWd    | F | 8.12                                 | 8.28                                    |
|          | M | 9.23                                 | 9.23                                    |
| UICLe    | F | 12.62                                | 12.82                                   |
|          | M | 13.99                                | 13.99                                   |
| LrCLe    | F | 12.95                                | 12.70                                   |
|          | M | 14.27                                | 14.27                                   |
| LiCLe    | F | 12.76                                | 12.48                                   |
|          | M | 14.03                                | 14.02                                   |
| Ur4PMtub | F | 16.36                                | 16.41                                   |
|          | M | 17.02                                | 17.02                                   |

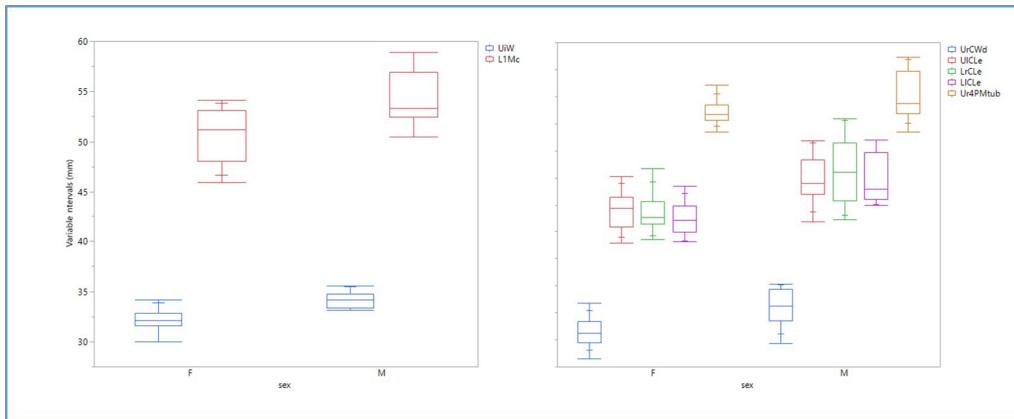

**Figure S1.** Boxplots for the dental measurements without the outlier values considering sex as a source of variation. The intervals include the minimum, maximum, mean, and quartiles values for each variable according to sex.

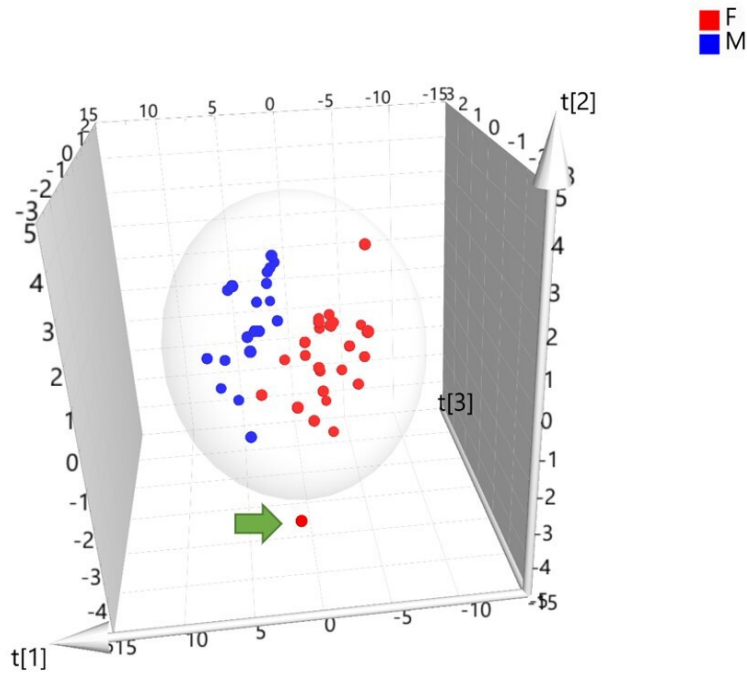

$R^2X[1] = 0.505$ ;  $R^2X[2] = 0.0902$ ;  $R^2X[3] = 0.0498$ ; Ellipse: Hotelling's T2 (95%)

**Figure S2.** The 3D scatter PLS-DA plot showing the sex differentiation before the outlier female sample (green arrow) was excluded from the multivariate analysis. The outlier sample was outside the Hotelling's T2 95 % confidence level. The initial latent variables  $t[1]$ ,  $t[2]$ , and  $t[3]$ , explained 50.5, 9.02, and 4.98% of the variability, respectively. The whole model explained 64.5 % of the variance.
